# Supplementary material for: Development of a Mouse Model to Explore CD4 T Cell Specificity, Phenotype, and Recruitment to the Lung after Influenza B Infection
Source: MDPI journal article supplement (doi:10.3390/pathogens11020251), 2022-02-15
Supplement: s1 [file s1]

## Supplemental Data

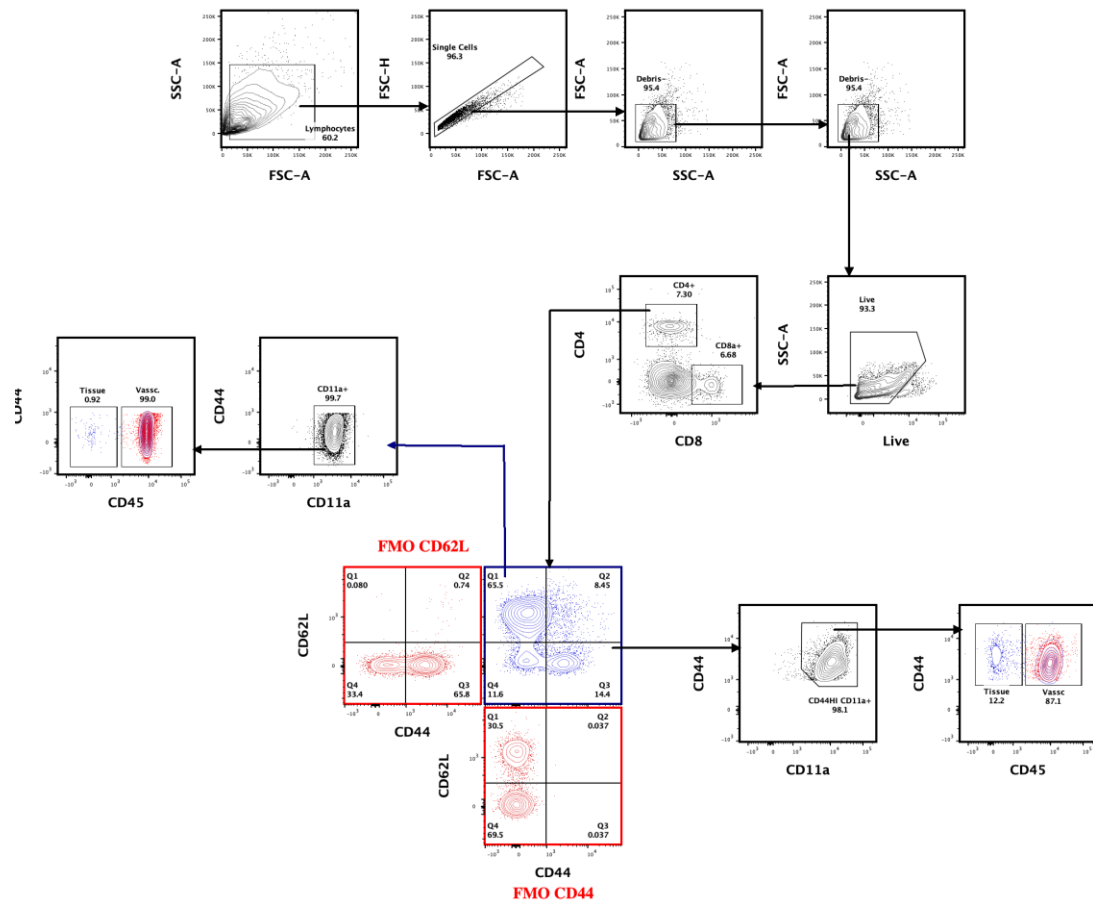

**Supplementary Figure S1.** Gating scheme to quantify naïve ( $CD44^- CD62L^+$ ) and  $CD44^{hi} CD4$  T cells in uninfected mice shown for data in Figure 5.

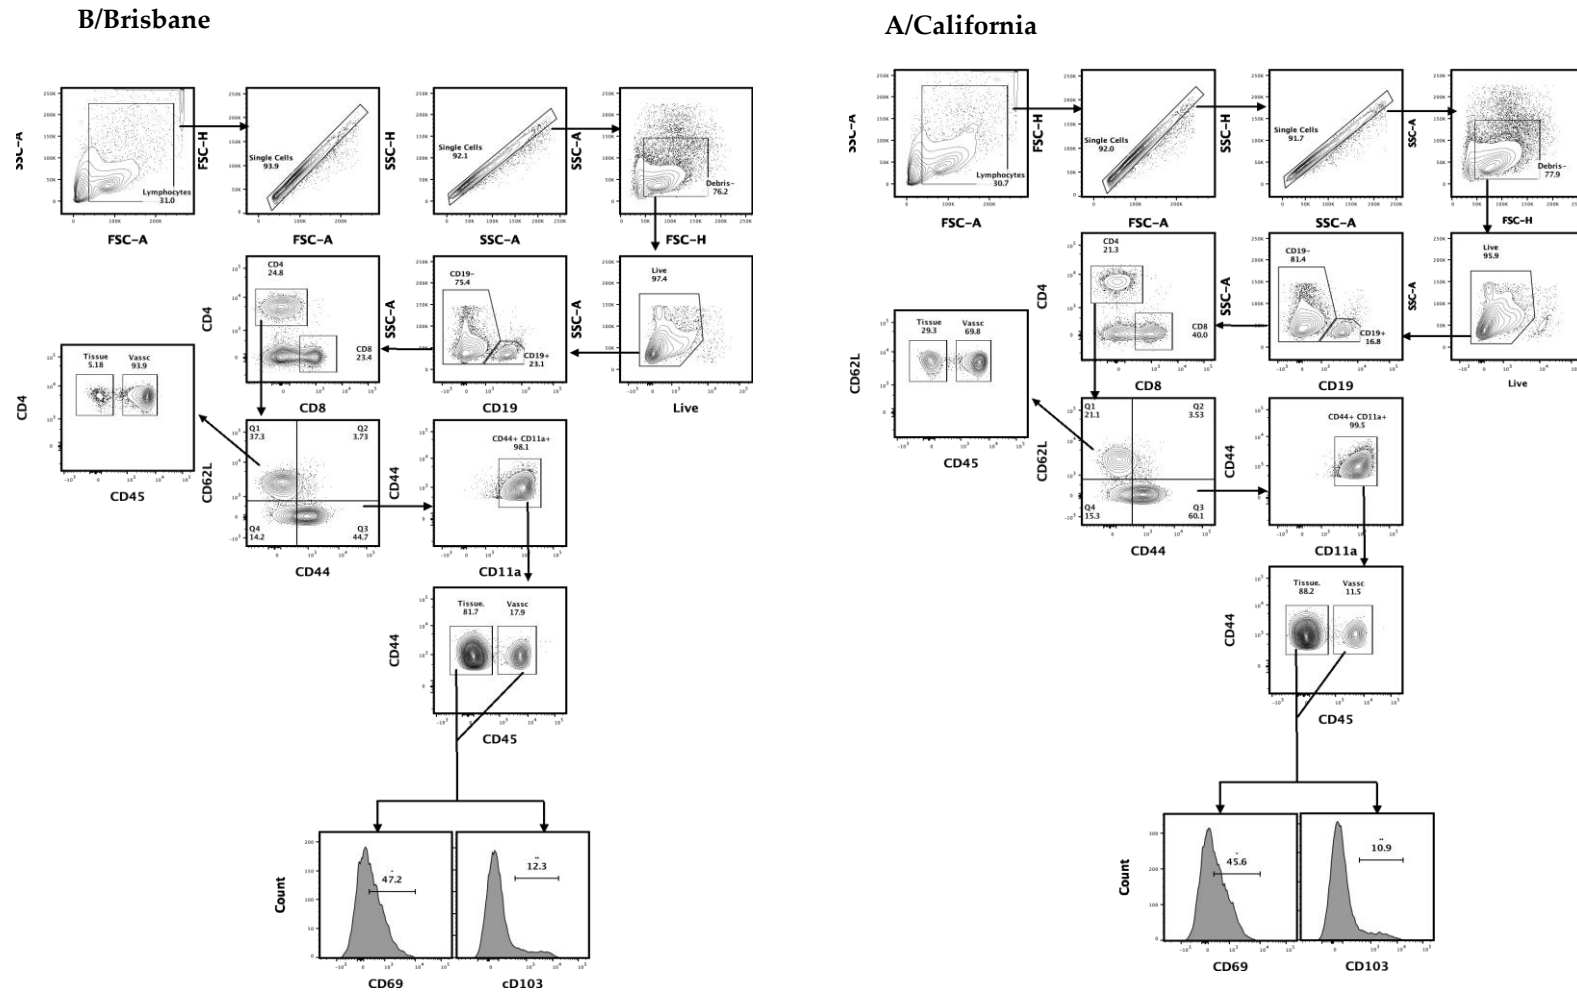

**Supplemental Figure S2. Gating scheme for analyses of polyclonal CD4 T cells in lung.** A sequential gating scheme as shown was used to identify antigen experienced CD4 T cells in the lung vasculature and tissue and to quantify surface markers (CD11a, CD69 and CD103, as shown).

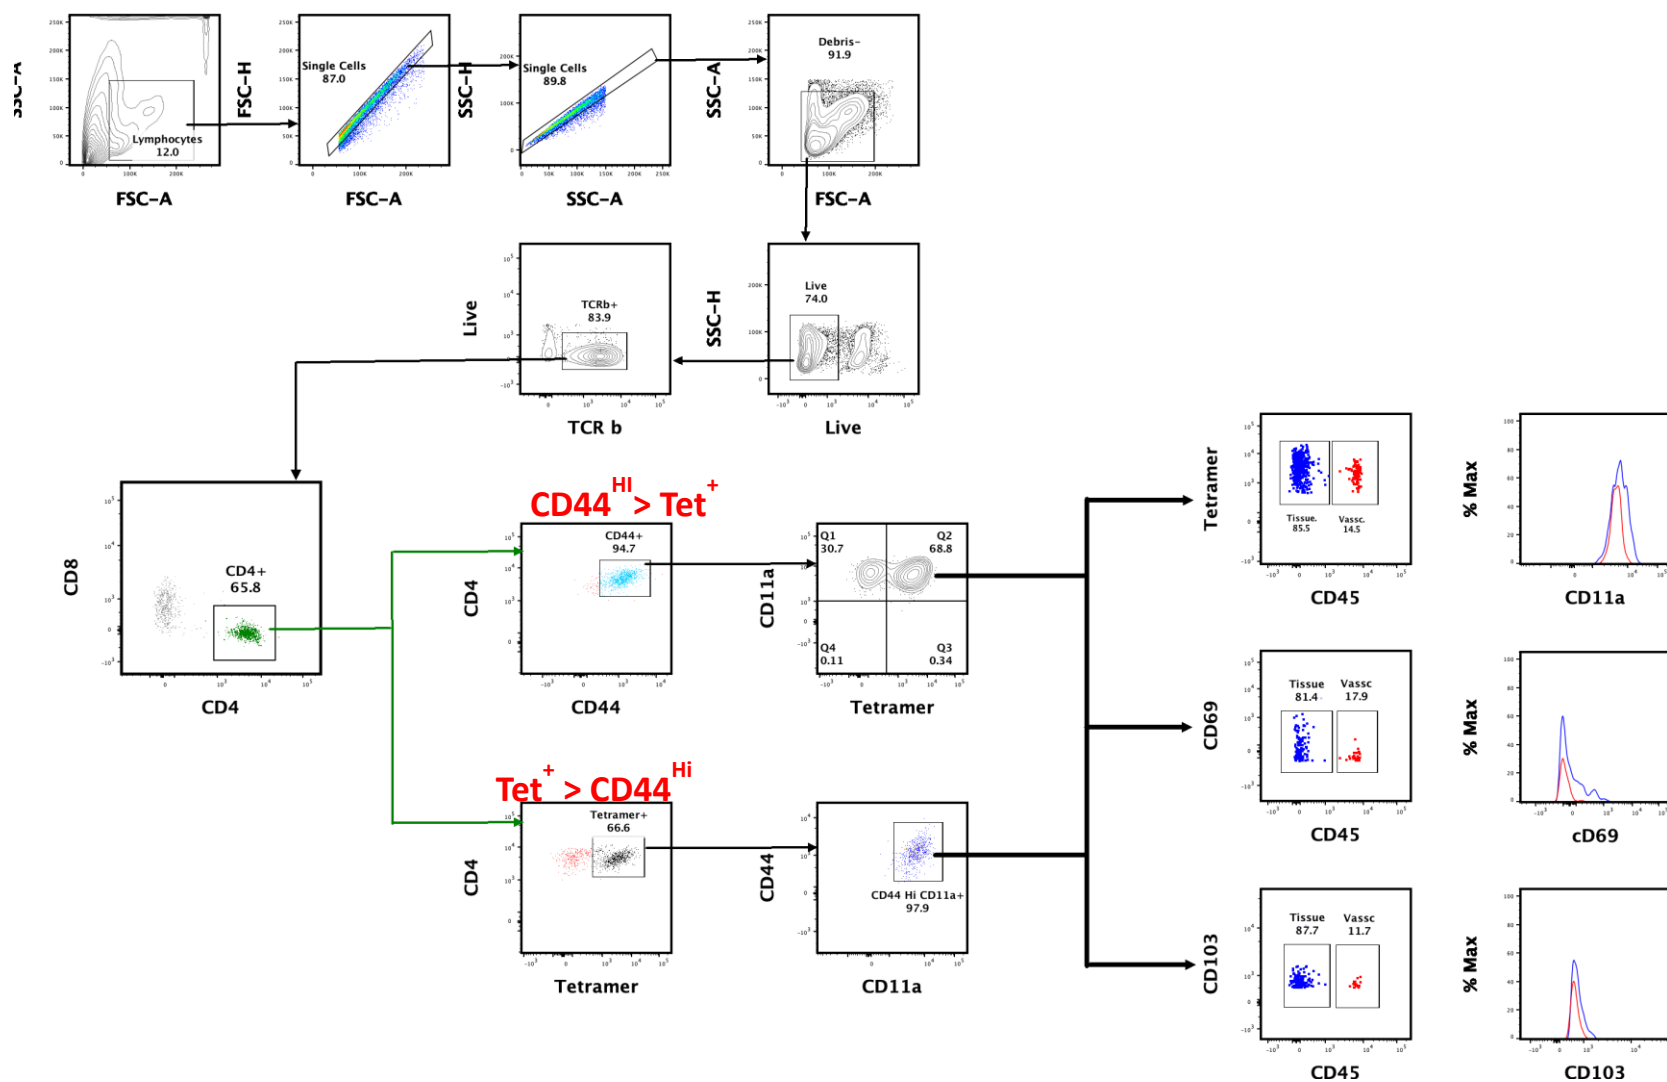

Supplementary Figure S3A. Flow cytometry gating scheme using MHC class II: peptide tetramers from lung CD4 T cells that were isolated from influenza B infected mice. Shown is the sequential gating scheme used to identify peptide epitope-specific CD4 T cells using the I-A<sup>b</sup>:HA-23 peptide tetramer (see Supplemental Table S1).

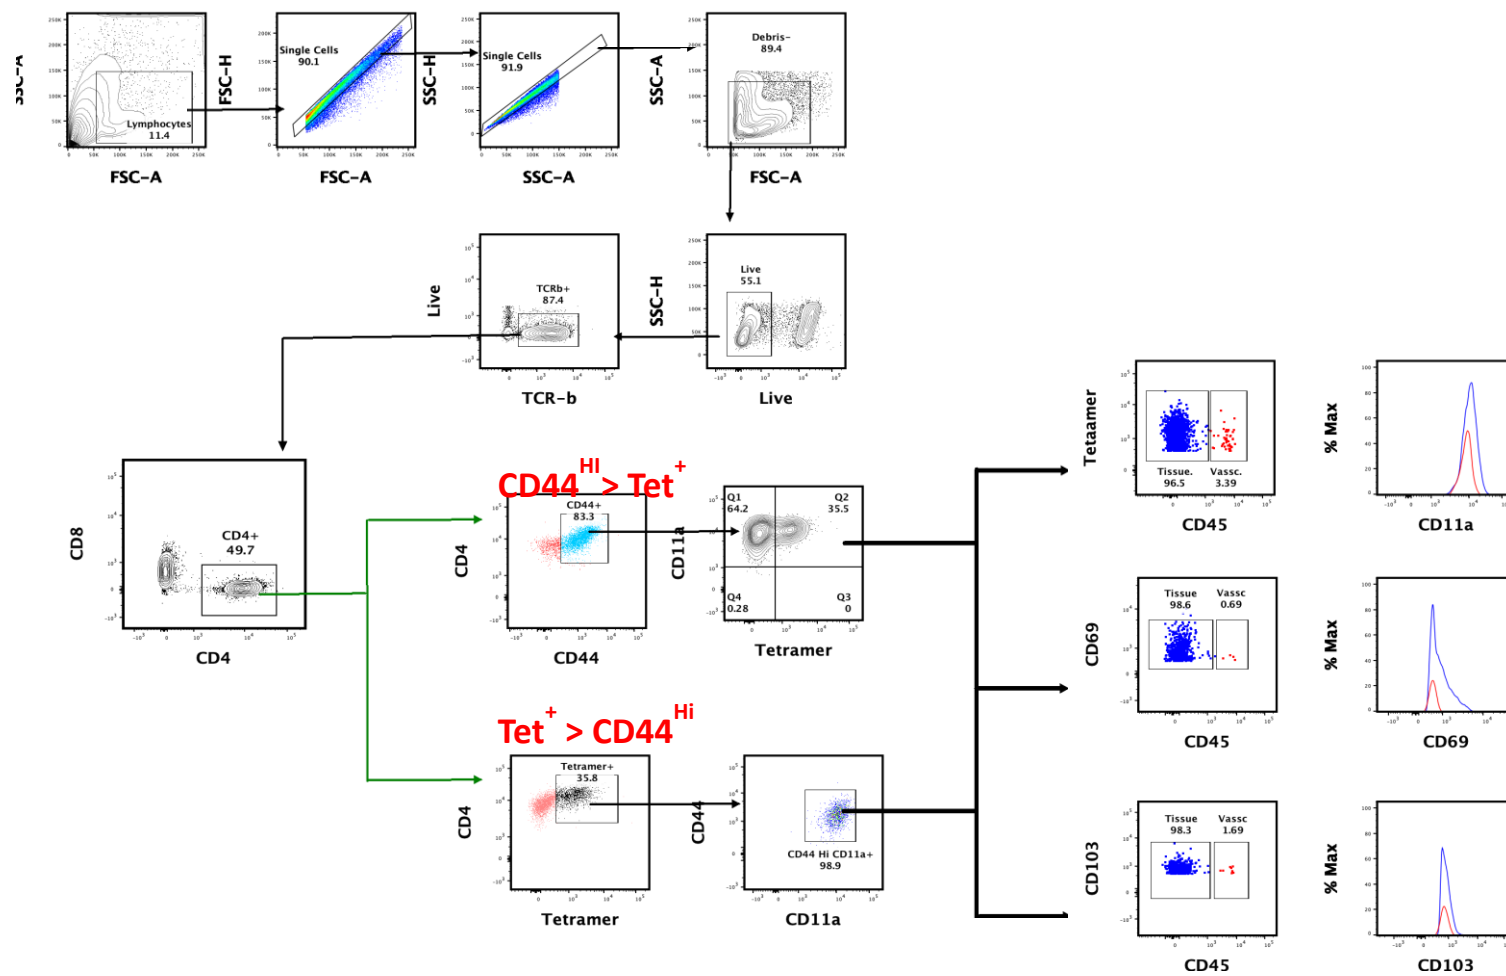

Supplementary Figure S3B. Flow cytometry gating scheme using MHC class II: peptide tetramers from lung CD4 T cells isolated from influenza A infected mice. Shown is the sequential gating scheme used to identify peptide epitope-specific CD4 T cells using the I-A<sup>b</sup>:NP-263 peptide tetramer (see Supplemental Table S1).

**Supplemental Table S1.** Peptide nomenclature and sequences.

**TABLE S1.1: Influenza B peptides**

| Peptide name | Peptide sequence                 | Peptide length |
|--------------|----------------------------------|----------------|
| *HA 23       | <b>23 TSSNSPHVVKTATQGE 38</b>    | 16             |
| HA 97        | <b>97 SILHEVRPVTSGCFP 111</b>    | 15             |
| HA 483       | <b>483 KLKKMLGPSAVEIGN 497</b>   | 15             |
| NP 316       | <b>316 LLARSMVVVRPSVASKV 332</b> | 17             |
| NP 321       | <b>321 MVVVRPSVASKVVLPI 337</b>  | 17             |
| NP 346       | <b>346 GFNVEEYSMVGYEAMAL 362</b> | 17             |
| NP 358       | <b>358 EAMALYNMATPVSILRM 374</b> | 17             |
| NP 391       | <b>391 GAAYEDLRVLSALTGTE 407</b> | 17             |
| NP 465       | <b>465 SPVFAVERPIALSKQA 480</b>  | 16             |
| NA 77        | <b>77 EPEWTPRLSCPGST 91</b>      | 15             |
| NA 173       | <b>173 HMAAWSGSACHDGKE 187</b>   | 15             |
| NA 177       | <b>177 WSGSACHDGKEWTYI 191</b>   | 15             |
| NA 321       | <b>321 TYLDTPRPNDGSITG 335</b>   | 16             |
| NS1 8        | <b>8 TTQIEVGPGATNATIN 22</b>     | 16             |
| NS1 85       | <b>85 MKVLLFMNPSAGIEGF 100</b>   | 16             |
| NS1 89       | <b>89 LFMNPSAGIEGFEPYC 104</b>   | 16             |
| NS1 109      | <b>189 VNGTFLKHPNGYKSL 204</b>   | 16             |

**TABLE S1.2: Influenza A/California peptides**

|        |        |                                     |    |
|--------|--------|-------------------------------------|----|
| NA 28  | NA 109 | <b>109-GSKGDVVFVIREPFIS-123</b>     | 15 |
| NA 39  | NA 153 | <b>153-SPYRTLMSCPIGEVPS-168</b>     | 16 |
| NA 45  | NA 177 | <b>177-VAWSASACHDGINWL-191</b>      | 15 |
| NA 56  | NA 221 | <b>11515221-NNILRTQESECACVN-235</b> | 15 |
| NS1 3  | NS1 9  | <b>9-FQVDCFLWHIRKFA-23</b>          | 16 |
| NS1 4  | NS1 13 | <b>13-CFLWHIRKRFADNGL-27</b>        | 16 |
| NS1 13 | NS1 49 | <b>49-TLGLDIETATLVGKQ-63</b>        | 16 |
| NS1 23 | NS1 89 | <b>89-YLSDMTLEEMSRDWF-103</b>       | 16 |
| M1 35  | M1 137 | <b>137-TVTTEAAFGLVCATC-151</b>      | 15 |
| M1 46  | M1 181 | <b>181-LASTTAKAMEQMAGS-195</b>      | 15 |
| M1 47  | M1 185 | <b>185-TAKAMEQMAGSSEQA-199</b>      | 15 |
| M1 53  | M1 209 | <b>209-TRQMVHAMRTIGTHPS-224</b>     | 15 |
| M1 55  | M1 217 | <b>217-RTIGTHPSSSAGLKD-231</b>      | 15 |

**Supplemental Table S2.** IFN $\gamma$  EliSpot kinetics of CD4 T cell response in different tissues.

| Virus         | B/Brisbane                |         |        |               | A/California              |        |        |
|---------------|---------------------------|---------|--------|---------------|---------------------------|--------|--------|
|               | CD4 T cells Spots/million |         |        |               | CD4 T cells Spots/million |        |        |
| Viral Protein | Day 7                     | Day 10  | Day 16 | Viral protein | Day 7                     | Day 10 | Day 16 |
| Lung          |                           |         |        |               |                           |        |        |
|               |                           |         |        |               |                           |        |        |
| NA-B          | 3490.0                    | 11727.5 | 7628.5 | NA-A          | 932.5                     | 8080.0 | 6725.0 |
| NP-B          | 2575.8                    | 11715.0 | 7029.9 | NP-A          | 3541.7                    | 9082.5 | 7050.0 |
|               |                           |         |        |               |                           |        |        |
| mLN           |                           |         |        |               |                           |        |        |
|               |                           |         |        |               |                           |        |        |
| NA-B          | 1535.8                    | 2156.1  | 2138.8 | NA-A          | 131.7                     | 986.3  | 385.8  |
| NP-B          | 1361.7                    | 2693.3  | 2297.9 | NP-A          | 322.3                     | 1051.7 | 652.1  |
|               |                           |         |        |               |                           |        |        |
| Spleen        |                           |         |        |               |                           |        |        |
|               |                           |         |        |               |                           |        |        |
| NA-B          | 2478.9                    | 1670.6  | 1142.9 | NA-A          | 1251.0                    | 445.6  | 82.5   |
| NP-B          | 2406.2                    | 2115.6  | 1423.8 | NP-A          | 2293.5                    | 613.1  | 181.9  |
